# Supplementary material for: Fabrication of doped Cu-TCNQ nanocrystals and their optoelectronic properties
Source: Royal Society of Chemistry journal article supplement (doi:10.1039/c2ce25926e), 2012-01-01
Supplement: c2ce25926e.pdf [file c2ce25926e.pdf]

## Electronic Supplementary Information (ESI)

### Optoelectronic properties of doped Cu-TCNQ nanocrystals

Tsunenobu Onodera,<sup>\*a</sup> Satomi Matsuo,<sup>a</sup> Kentaro Hiraishi,<sup>a</sup> Akito Masuhara,<sup>b</sup> Hitoshi Kasai<sup>a</sup> and Hidetoshi Oikawa<sup>a</sup>

<sup>a</sup> Institute of Multidisciplinary Research for Advanced Materials, Tohoku University, Katahira 2-1-1, Aoba-ku, Sendai 980-8577, Japan. Fax: +81-22-217-5645; Tel: +81-22-217-5645; E-mail: onoderat@tagen.tohoku.ac.jp

<sup>b</sup> Graduate School of Science and Technologies, Yamagata University, Jonan 4-3-16, Yonezawa, Japan.

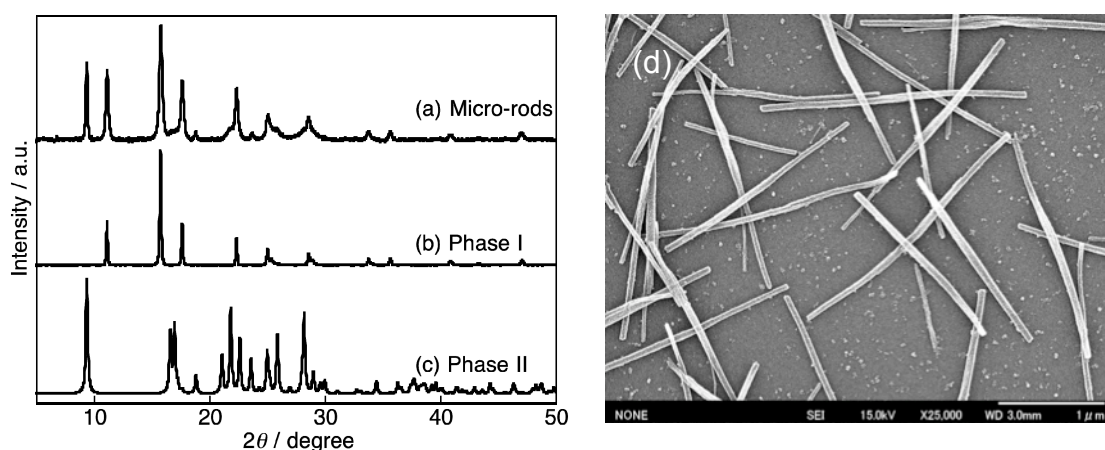

**Figure S1** PXR D patterns of (a) Cu-TCNQ micro-rods and (b) Phase I bulk crystal, and simulated pattern of (c) Phase II.<sup>S1</sup> (d) SEM image of Cu-TCNQ micro-rods corresponding to (a).

#### Reference

S1. A. Heintz, H. Zhao, X. Ouyang, G. Grandinetti, J. Cowen, and K. R. Dunbar, *Inorg. Chem.*, 1999, **38**, 144-156.
